# Supplementary material
Source: Springer Nature journal article supplement (https://www.springermedizin.de/resource/supplementary/12889_2012_4944_MOESM1_ESM.pdf/9495792)

## Women

O.R.

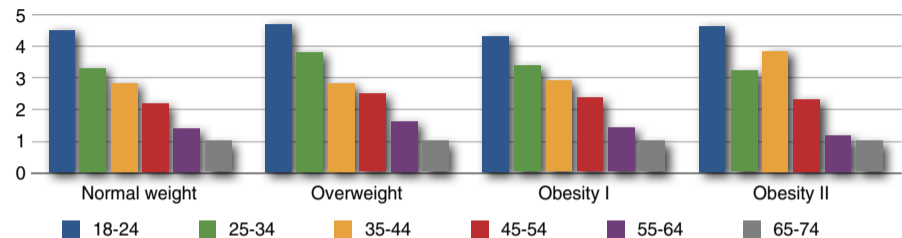

## Men

O.R.

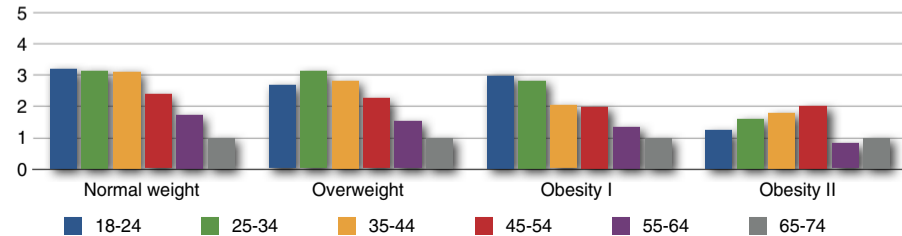

Supplement: MOESM1 [file 9495792]
